# Supplementary material
Source: PubMed Central journal article supplement (PMC1142372)
Supplement: pnas_0501190102_2.pdf [file pnas_0501190102_2.pdf]

**Table 3. Sequences of peptides eluted from HLA-DR**

| Gene symbol | Peptide sequence |   |   |   |   |   |   |   |   |   |   |   |   | Entrez gene ID | Score | Rank |      |      |       |       |      |       |      |       |      |      |      |      |      |
|-------------|------------------|---|---|---|---|---|---|---|---|---|---|---|---|----------------|-------|------|------|------|-------|-------|------|-------|------|-------|------|------|------|------|------|
|             | -                | - | - | 1 | 2 | 3 | 4 | 5 | 6 | 7 | 8 | 9 | + |                |       |      | +    | +    |       |       |      |       |      |       |      |      |      |      |      |
|             | 3                | 2 | 1 |   |   |   |   |   |   |   |   |   | 1 | 2              | 3     |      |      |      |       |       |      |       |      |       |      |      |      |      |      |
| HLA-A       |                  |   |   | F | V | R | F | D | S | D | A | A | S | Q              | R     |      | 3105 | 28   | 1/256 |       |      |       |      |       |      |      |      |      |      |
|             |                  |   |   | F | V | R | F | D | S | D | A | A | S | Q              | R     | M    | E    |      |       | 3105  |      |       |      |       |      |      |      |      |      |
|             |                  |   |   | Q | F | V | R | F | D | S | D | A | A | S              | Q     | R    | M    |      |       | E     | 3105 |       |      |       |      |      |      |      |      |
|             |                  |   | T | Q | F | V | R | F | D | S | D | A | A | S              | Q     |      |      |      |       | 3105  |      |       |      |       |      |      |      |      |      |
|             |                  |   | T | Q | F | V | R | F | D | S | D | A | A | S              | Q     | R    |      |      |       | 3105  |      |       |      |       |      |      |      |      |      |
|             |                  |   | T | Q | F | V | R | F | D | S | D | A | A | S              | Q     | R    | M    |      |       |       | 3105 |       |      |       |      |      |      |      |      |
|             |                  |   | T | Q | F | V | R | F | D | S | D | A | A | S              | Q     | R    | M    |      |       | E     | P    | 3105  |      |       |      |      |      |      |      |
|             |                  | D | T | Q | F | V | R | F | D | S | D | A | A | S              | Q     |      |      |      |       | 3105  |      |       |      |       |      |      |      |      |      |
|             |                  | D | T | Q | F | V | R | F | D | S | D | A | A | S              | Q     | R    |      |      |       | 3105  |      |       |      |       |      |      |      |      |      |
|             |                  | D | T | Q | F | V | R | F | D | S | D | A | A | S              | Q     | R    | M    |      |       |       | 3105 |       |      |       |      |      |      |      |      |
|             |                  | D | T | Q | F | V | R | F | D | S | D | A | A | S              | Q     | R    | M    |      |       | E     | 3105 |       |      |       |      |      |      |      |      |
|             |                  | D | T | E | F | V | R | F | D | S | D | A | A | S              | Q     | R    | M    |      |       | E     | 3105 |       |      |       |      |      |      |      |      |
|             |                  | D | T | Q | F | V | R | F | D | S | D | A | A | S              | Q     | R    | M    |      |       | E     | P    | 3105  |      |       |      |      |      |      |      |
|             |                  | D | T | E | F | V | R | F | D | S | D | A | A | S              | Q     | R    | M    |      |       | E     | P    | 3105  |      |       |      |      |      |      |      |
|             |                  | D | T | E | F | V | R | F | D | S | D | A | A | S              | Q     | R    | M    |      |       | o     | E    | P     | 3105 |       |      |      |      |      |      |
|             |                  | D | T | Q | F | V | R | F | D | S | D | A | A | S              | Q     | R    | M    |      |       | E     | P    | R     | 3105 |       |      |      |      |      |      |
|             |                  | D | T | Q | F | V | R | F | D | S | D | A | A | S              | Q     | R    | M    |      |       | E     | P    | R     | A    | P     | 3105 |      |      |      |      |
|             |                  | D | D | T | Q | F | V | R | F | D | S | D | A | A              | S     | Q    | R    |      |       |       |      | 3105  |      |       |      |      |      |      |      |
|             |                  | D | D | T | Q | F | V | R | F | D | S | D | A | A              | S     | Q    | R    |      |       | M     | E    | 3105  |      |       |      |      |      |      |      |
|             |                  | D | D | T | Q | F | V | R | F | D | S | D | A | A              | S     | Q    | R    |      |       | M     | E    | P     | 3105 |       |      |      |      |      |      |
|             |                  | D | D | T | Q | F | V | R | F | D | S | D | A | A              | S     | Q    | R    |      |       | M     | E    | P     | R    | 3105  |      |      |      |      |      |
|             | V                | D | D | T | Q | F | V | R | F | D | S | D | A | A              | S     | Q    | R    |      |       |       |      | 3105  |      |       |      |      |      |      |      |
|             | V                | D | D | T | Q | F | V | R | F | D | S | D | A | A              | S     | Q    | R    |      |       | M     |      | 3105  |      |       |      |      |      |      |      |
|             | V                | D | D | T | Q | F | V | R | F | D | S | D | A | A              | S     | Q    | R    |      |       | M     | E    | P     | 3105 |       |      |      |      |      |      |
|             | V                | D | D | T | Q | F | V | R | F | D | S | D | A | A              | S     | Q    | R    |      |       | M     | E    | P     | R    | 3105  |      |      |      |      |      |
|             | V                | D | D | T | Q | F | V | R | F | D | S | D | A | A              | S     | Q    | R    |      |       | M     | E    | P     | R    | A     | P    | 3105 |      |      |      |
|             | V                | D | D | T | Q | F | V | R | F | D | S | D | A | A              | S     | Q    | R    |      |       | M     | E    | P     | R    | A     | P    | W    | 3105 |      |      |
|             | V                | D | D | T | Q | F | V | R | F | D | S | D | A | A              | S     | Q    | R    |      |       | M     | E    | P     | R    | A     | P    | W    | I    | E    | 3105 |
|             | V                | D | D | T | E | F | V | R | F | D | S | D | A | A              | S     | Q    | R    |      |       |       |      | 3105  |      |       |      |      |      |      |      |
|             | T                | T | K | H | K | W | E | A | A | H | V | A | E | Q              | L     | R    |      |      |       | 3105  | 22   | 5/256 |      |       |      |      |      |      |      |
|             |                  | K | H | K | W | E | A | A | H | V | A | E | Q | L              | R     |      | 3105 |      |       |       |      |       |      |       |      |      |      |      |      |
|             | HLA-B            |   |   | T | L | F | V | R | F | D | S | D | A | T              | S     | P    |      |      |       | 3106  | 28   | 1/362 |      |       |      |      |      |      |      |
|             |                  |   | D | T | L | F | V | R | F | D | S | D | A | T              | S     | P    | R    |      |       | K     |      |       | E    | P     | R    | A    | P    | 3106 |      |
|             |                  | V | D | D | T | L | F | V | R | F | D | S | D | A              | T     | S    | P    |      |       | R     |      |       | K    | E     | P    | R    | A    | P    | 3106 |
|             |                  |   | L | S | S | W | T | A | A | D | T | A | A | Q              | I     | T    |      |      |       |       |      |       | 3106 |       |      |      |      |      |      |
|             |                  |   | L | S | S | W | T | A | A | D | T | A | A | Q              | I     | T    | Q    |      |       |       |      |       | 3106 |       |      |      |      |      |      |
|             |                  |   | L | S | S | W | T | A | A | D | T | A | A | Q              | I     | T    | Q    |      |       | R     |      |       |      | 3106  |      |      |      |      |      |
|             |                  |   | L | S | S | W | T | A | A | D | T | A | A | Q              | I     | T    | Q    |      |       | R     |      |       | K    | W     |      | 3106 |      |      |      |
|             |                  |   | L | S | S | W | T | A | A | D | T | A | A | Q              | I     | T    | Q    |      |       | R     |      |       | K    | W     | E    |      | 3106 |      |      |
|             |                  |   | L | S | S | W | T | A | A | D | T | A | A | E              | I     | T    | E    |      |       | R     |      |       | K    | W     | E    |      | 3106 |      |      |
|             |                  |   | D | L | S | S | W | T | A | A | D | T | A | A              | Q     | I    | T    |      |       |       |      |       | 3106 |       |      |      |      |      |      |
|             |                  |   | D | L | S | S | W | T | A | A | D | T | A | A              | Q     | I    | T    |      |       | Q     |      |       |      | 3106  |      |      |      |      |      |
|             |                  |   | D | L | S | S | W | T | A | A | D | T | A | A              | Q     | I    | T    |      |       | Q     |      |       | R    |       | 3106 |      |      |      |      |
|             |                  |   | D | L | S | S | W | T | A | A | D | T | A | A              | Q     | I    | T    |      |       | Q     |      |       | R    | K     | W    |      | 3106 |      |      |
|             |                  |   | D | L | S | S | W | T | A | A | D | T | A | A              | Q     | I    | T    |      |       | Q     |      |       | R    | K     | W    | E    |      | 3106 |      |
|             |                  | D | L | S | S | W | T | A | A | D | T | A | A | Q              | I     | T    | Q    | R    | K     | W     |      |       | E    | A     | A    | 3106 |      |      |      |
|             |                  | D | L | S | S | W | T | A | A | D | T | A | A | Q              | I     | T    | Q    | R    | K     | W     |      |       | E    | A     | A    | R    | V    | A    | 3106 |
| E           |                  | D | L | S | S | W | T | A | A | D | T | A | A | Q              | I     | T    | Q    | R    |       | 3106  |      |       |      |       |      |      |      |      |      |
| E           |                  | D | L | S | S | W | T | A | A | D | T | A | A | Q              | I     | T    |      | 3106 |       |       |      |       |      |       |      |      |      |      |      |
| E           |                  | D | L | S | S | W | T | A | A | D | T | A | A | Q              | I     | T    | Q    | R    | K     | W     |      |       |      | 3106  |      |      |      |      |      |
| E           |                  | D | L | S | S | W | T | A | A | D | T | A | A | Q              | I     | T    | Q    | R    | K     | W     |      |       | E    |       | 3106 |      |      |      |      |
| E           |                  | D | L | S | S | W | T | A | A | D | T | A | A | Q              | I     | T    | Q    | R    | K     | W     |      |       | E    | A     | A    | R    | V    | A    | 3106 |
| N           |                  | E | D | L | S | S | W | T | A | A | D | T | A | A              | Q     | I    | T    | Q    | R     | K     |      |       | W    |       | 3106 |      |      |      |      |
| L           |                  | N | E | D | L | S | S | W | T | A | A | D | T | A              | A     | Q    | I    | T    | Q     | R     |      |       | K    | W     | E    |      | 3106 |      |      |
|             |                  | K | D | Y | I | A | L | N | E | D | L | S | S | W              | T     | A    |      | 3106 | 26    | 4/362 |      |       |      |       |      |      |      |      |      |
|             |                  | G | P | E | Y | W | D | R | E | T | Q | I | S | K              | T     | N    |      | 3106 |       |       |      |       | 28   | 1/362 |      |      |      |      |      |

| Gene symbol | Peptide sequence                                | Entrez gene ID | Score | Rank   |
|-------------|-------------------------------------------------|----------------|-------|--------|
|             | - - - 1 2 3 4 5 6 7 8 9 + + +<br>3 2 1 1 2 3    |                |       |        |
| HLA-B       | L R W E P S S Q S T V P I V G I V A G           | 3106           | 26    | 4/362  |
| HLA-C       | F V Q F D S D A A S P R G E P                   | 3107           | 28    | 1/366  |
|             | T Q F V Q F D S D A A S P R                     | 3107           |       |        |
|             | T Q F V Q F D S D A A S P R G E P R             | 3107           |       |        |
|             | D T Q F V Q F D S D A A S P R                   | 3107           |       |        |
|             | D T Q F V Q F D S D A A S P R G                 | 3107           |       |        |
|             | D T Q F V Q F D S D A A S P R G E P R           | 3107           |       |        |
|             | D T Q F V Q F D S D A A S P R G E P R A P       | 3107           |       |        |
|             | D D T Q F V Q F D S D A A S P R                 | 3107           |       |        |
|             | V D D T Q F V Q F D S D A A S P R G E P R       | 3107           |       |        |
|             | V D D T Q F V Q F D S D A A S P R G E P R A P   | 3107           |       |        |
|             | Y V D D T Q F V Q F D S D A A S P R G E P R A P | 3107           |       |        |
|             | D Y I A L N E D L R S W T                       | 3107           | 18    | 35/366 |
|             | D Y I A L N E D L R S W T A                     | 3107           |       |        |
|             | K D Y I A L N E D L R S W T A                   | 3107           |       |        |
|             | K D Y I A L N E D L R S W T                     | 3107           |       |        |
|             | K D Y I A L N E D L R S W                       | 3107           |       |        |
|             | G K D Y I A L N E D L R S W T                   | 3107           |       |        |
|             | G K D Y I A L N E D L R S W T A                 | 3107           |       |        |
|             | D G K D Y I A L N E D L R S W T                 | 3107           |       |        |
|             | D G K D Y I A L N E D L R S W T A               | 3107           |       |        |
|             | D G K D Y I A L N E D L R S W T A A             | 3107           |       |        |
|             | G R L L R G Y N Q F A Y D G K                   | 3107           | 22    | 8/366  |
| HLA-E       | L R S W T A V D T A A Q I S                     | 3133           | 28    | 1/358  |
|             | L R S W T A V D T A A Q I S E Q                 | 3133           |       |        |
|             | D L R S W T A V D T A A Q I S E Q               | 3133           |       |        |
| IGHMBP2     | E P R R Y G S A A A L P S                       | 3508           | 22    | 27/993 |
| CLN5        | G H L K I M H D A I G F R                       | 1203           | 18    | 45/407 |
|             | L G H L K I M H D A I G F R                     | 1203           |       |        |
| HLA-DRB1    | Y V R F D S D V G E Y                           | 3123           | 22    | 6/266  |
|             | Q E E Y V R F D S D V G E Y R                   | 3123           |       |        |
|             | H Q E E Y V R F D S D V G E Y R                 | 3123           | 22    | 6/266  |
|             | H Q E E Y V R F D S D V G E Y R A               | 3123           |       |        |
|             | H Q E E Y V R F D S D V G E Y R A V             | 3123           |       |        |
|             | G A G L F I Y F R N Q K G H S                   | 3123           | 22    | 6/266  |
| HLA-DRA     | A Q G A L A N I A V D K A N L E I               | 3122           | 20    | 13/254 |
|             | I Q A E F Y L N P D Q S G E F                   | 3122           | 20    | 13/254 |
| HLA-DQB1    | D V E V Y R A V T P L G P P D                   | 3119           | 20    | 9/229  |
| HLA-DPB1    | N R E E F V R F D S D V G E F R                 | 3115           | 22    | 1/58   |
|             | R E E F V R F D S D V G E F R                   | 3115           |       |        |
| B2M         | Y T E F T P T E K D E Y                         | 567            | 22    | 4/119  |
|             | Y Y T E F T P T E K D E Y                       | 567            |       |        |
|             | L L Y Y T E F T P T E K                         | 567            |       |        |
|             | L L Y Y T E F T P T E K D                       | 567            |       |        |
|             | L L Y Y T E F T P T E K D E                     | 567            |       |        |
|             | L L Y Y T E F T P T E K D E Y                   | 567            |       |        |
|             | L L Y Y T E F T P T E K D E Y A                 | 567            |       |        |
|             | Y L L Y Y T E F T P T E K                       | 567            |       |        |
|             | Y L L Y Y T E F T P T E K D                     | 567            |       |        |
|             | Y L L Y Y T E F T P T E K D E                   | 567            |       |        |
|             | Y L L Y Y T E F T P T E K D E Y                 | 567            |       |        |
|             | Y L L Y Y T E F T P T E K D E Y A               | 567            |       |        |
|             | F Y L L Y Y T E F T P T E K D                   | 567            |       |        |
|             | F Y L L Y Y T E F T P T E K D E Y               | 567            |       |        |
|             | F Y L L Y Y T E F T P T E K D E Y A             | 567            |       |        |
| HLA-G       | V D D T Q F V R F D S D S A C P R M E P         | 3135           | 28    | 1/338  |

| Gene symbol | Peptide sequence                                | Entrez gene ID | Score | Rank   |
|-------------|-------------------------------------------------|----------------|-------|--------|
|             | - - - 1 2 3 4 5 6 7 8 9 + + +<br>3 2 1 1 2 3    |                |       |        |
| HLA-G       | Y V D D T Q F V R F D S D S A C P R M E P R A P | 3135           |       |        |
| HLA-DMA     | F G P T F V S A V D G L S F Q                   | 3108           | 22    | 5/257  |
| ENO1        | K E K Y G K D A T N V G D E G G                 | 2023           | 22    | 9/433  |
|             | I K E K Y G K D A T N V G D E G G               | 2023           |       |        |
|             | I K E K Y G K D A T N V G D E G G               | 2023           |       |        |
|             | V I K E K Y G K D A T N V G D E G G             | 2023           |       |        |
|             | G V P L Y R H I A D L A G N                     | 2023           | 16    | 66/433 |
|             | G V P L Y R H I A D L A G N S E V               | 2023           |       |        |
|             | V P L Y R H I A D L A G N S E V I               | 2023           |       |        |
|             | V P L Y R H I A D L A G N S E V                 | 2023           |       |        |
|             | V P L Y R H I A D L A G N S E                   | 2023           |       |        |
|             | V P L Y R H I A D L A G N                       | 2023           |       |        |
| GM2A        | G N Y R I E S V L S S S G                       | 2760           | 22    | 2/193  |
|             | G N Y R I E S V L S S S G K                     | 2760           |       |        |
|             | T G N Y R I E S V L S S S G                     | 2760           |       |        |
|             | T G N Y R I E S V L S S S G K                   | 2760           |       |        |
|             | T G N Y R I E S V L S S S G K R                 | 2760           |       |        |
|             | T T G N Y R I E S V L S S S G                   | 2760           |       |        |
|             | T T G N Y R I E S V L S S S G K                 | 2760           |       |        |
|             | L G C I K I A A S L K G I                       | 2760           | 20    | 6/193  |
|             | R L G C I K I A A S L K G I                     | 2760           |       |        |
| SLC2A14     | V P M Y I G E I S P T A L R                     | 144195         | 28    | 1/497  |
| MIF         | S P D R V Y I N Y Y D M N A A N                 | 4282           | 20    | 5/114  |
|             | V P D G F L S E L T Q Q L A Q                   | 4282           | 28    | 1/114  |
|             | V P D G F L S E L T Q Q L A Q A                 | 4282           |       |        |
| TFRC        | C P S D W K T D S T C R M V T                   | 7037           | 28    | 1/760  |
|             | C P S D W K T D S T C R M V T S                 | 7037           |       |        |
|             | C P S D W K T D S T C R M V T S E               | 7037           |       |        |
|             | F T Y I N L D K A V L G T S N                   | 7037           | 22    | 19/760 |
|             | Y V A Y S K A A T V T G K L                     | 7037           | 22    | 19/760 |
|             | N S Q L L S F V R D L N Q Y R A D I             | 7037           | 26    | 5/760  |
| DHX34       | I R F V V D S G K V K E M                       | 9704           | 22    | 21/576 |
| RAD23B      | L L Q Q I S Q H Q E H F                         | 5887           | 20    | 15/409 |
| TUBB1       | A K F W E V I S D E H G I D P T                 | 7280           | 22    | 17/444 |
| TUBB5       | E P Y N A T L S V H Q L                         | 10382          | 22    | 17/444 |
|             | E P Y N A T L S V H Q L V E                     | 10382          |       |        |
| EEF1A1      | I E K F E K E A A E M G K G                     | 1917           | 20    | 18/463 |
|             | I E K F E K E A A E M G K G S                   | 1917           |       |        |
|             | I E K F E K E A A E M G K G S F                 | 1917           |       |        |
|             | T I E K F E K E A A E M G K G S F               | 1917           |       |        |
|             | S K Y Y V T I I D A P G H R D                   | 1917           | 16    | 60/462 |
| HSPA5       | V P T K K S Q I F S T A S D N Q P T V T         | 3309           | 20    | 29/654 |
|             | V M R I I N E P T A A A I A Y G                 | 3309           | 26    | 5/654  |
| HSPA6       | G E R A M T K D N N L L G R F E                 | 3310           | 20    | 23/643 |
| HSPA1B      | R I I N E P T A A A I A                         | 3303           | 26    | 5/641  |
|             | R I I N E P T A A A I A Y G                     | 3303           |       |        |
|             | V L R I I N E P T A A A I A                     | 3303           |       |        |
|             | V L R I I N E P T A A A I A Y                   | 3303           |       |        |
|             | V L R I I N E P T A A A I A Y G                 | 3303           |       |        |
|             | N V L R I I N E P T A A A I A                   | 3303           |       |        |
|             | N V L R I I N E P T A A A I A Y                 | 3303           |       |        |
|             | N V L R I I N E P T A A A I A Y G               | 3303           |       |        |
| HSPA8       | E G E R A M T K D N N L L G K F E               | 3312           | 20    | 15/646 |
|             | G E R A M T K D N N L L G K F E                 | 3312           |       |        |
|             | G E R A M T K D N N L L G K F E L               | 3312           |       |        |
|             | E R A M T K D N N L L G K F E                   | 3312           |       |        |

| Gene symbol        | Peptide sequence                                                                                                                                                                                                                                                                 | Entrez gene ID                                                       | Score    | Rank                      |
|--------------------|----------------------------------------------------------------------------------------------------------------------------------------------------------------------------------------------------------------------------------------------------------------------------------|----------------------------------------------------------------------|----------|---------------------------|
|                    | - - - 1 2 3 4 5 6 7 8 9 + + +<br>3 2 1 1 2 3                                                                                                                                                                                                                                     |                                                                      |          |                           |
| HSPA8              | E R A M T K D N N L L G K F E L<br>R A M T K D N N L L G K F E<br>G I L N V S A V D K S T G K E                                                                                                                                                                                  | 3312<br>3312<br>3303                                                 |          |                           |
| IL27RA             | V P Y R I T V T A V S A S G<br>V G V P Y R I T V T A V S A S G                                                                                                                                                                                                                   | 9466<br>9466                                                         | 20<br>22 | 21/646<br>9/636           |
| AHSG               | I S R A Q F V P L P V S V S V E                                                                                                                                                                                                                                                  | 280988                                                               | 22       | 6/359                     |
| SYNGR2             | N P K D V L V G A D S V R A A I T F                                                                                                                                                                                                                                              | 9144                                                                 | 26       | 3/224                     |
| MS4A1              | S G P K P L F R R M S S L V G P T Q S F<br>S G P K P L F R R M S S L V G P T Q S<br>G P K P L F R R M S S L V G P T Q S<br>G P K P L F R R M S S L V G P T<br>G P K P L F R R M S S L V G P<br>G P K P L F R R M S S L V G P                                                     | 931<br>931<br>931<br>931<br>931<br>931                               | 18       | 41/297                    |
|                    | o<br>x                                                                                                                                                                                                                                                                           |                                                                      |          |                           |
| RAB6B              | L I P S Y I R D S T V A V V V                                                                                                                                                                                                                                                    | 51560                                                                | 28       | 1/208                     |
| RAB7               | F P E P I K L D K N D R A K A S A                                                                                                                                                                                                                                                | 7879                                                                 | 26       | 2/207                     |
| CTSC               | D H N F V K A I N A I Q K S W<br>Y D H N F V K A I N A I Q K<br>Y D H N F V K A I N A I Q K S<br>Y D H N F V K A I N A I Q K S W<br>Y D H N F V K A I N A I Q K S W T<br>K Y D H N F V K A I N A I Q K S W T<br>S G M D Y W I V K N S W G T G W G<br>K V V V Y L Q K L D T A Y D | 1075<br>1075<br>1075<br>1075<br>1075<br>1075<br>1075<br>1075<br>1075 | 28<br>22 | 1/463<br>11/463<br>30/463 |
| CTSC               | K K V V V Y L Q K L D T A Y D D L G                                                                                                                                                                                                                                              | 1075                                                                 | 20       |                           |
| TF                 | F V K D Q T V I Q N T D<br>D V A F V K D Q T V I Q N T D<br>D V A F V K D Q T V I Q<br>G D V A F V K D Q T V I Q<br>G D V A F V K D Q T V I Q N T D                                                                                                                              | 7018<br>7018<br>7018<br>7018<br>7018                                 | 28       | 1/704                     |
| CNDP2              | L A K W V A I Q S V S A W P E                                                                                                                                                                                                                                                    | 55748                                                                | 28       | 1/475                     |
| WBSR1              | D I D A I F K D L S I R S V R                                                                                                                                                                                                                                                    | 7458                                                                 | 26       | 1/248                     |
| GEF2               | A I F L F V D K T V P Q S S L T<br>A I F L F V D K T V P Q S S L<br>A I F L F V D K T V P Q S S<br>F V D K T V P Q S S L<br>L P S E K A I F L F V D K T V P Q S S<br>L P S E K A I F L F V D K T V P Q S S                                                                       | 11345<br>11345<br>11345<br>11345<br>11345<br>11345                   | 18<br>26 | 17/117<br>2/117           |
| M17S2              | S G T Q F V C E T V I R S L<br>S G T Q F V C E T V I R S L T<br>S G T Q F V C E T V I R S L T L D                                                                                                                                                                                | 4077<br>4077<br>4077                                                 |          | 22/966                    |
| RAP1A              | T E Q F T A M R D L Y M K N                                                                                                                                                                                                                                                      | 5906                                                                 | 16       | 30/184                    |
| CTSZ               | G T E Y W I V R N S W G E P W                                                                                                                                                                                                                                                    | 1522                                                                 | 22       | 6/303                     |
| LGMN               | V P K D Y T G E D V T P Q N<br>G V P K D Y T G E D V T P Q N                                                                                                                                                                                                                     | 5641<br>5641                                                         | 22       | 11/433                    |
| GAPD               | L Q N I I P A S T G A A K A V G                                                                                                                                                                                                                                                  | 2597                                                                 | 26       | 4/334                     |
| DKFZp43400<br>32.1 | L L Q K L I L W R V L                                                                                                                                                                                                                                                            |                                                                      | 20       | 24/415                    |
| HIST1H2BL          | V N D I F E R I A S E A S R L A H Y N<br>V N D I F E R I A S E A S R L A<br>D I F E R I A S E A S R L A H Y N<br>D I F E R I A S E A S R L A H Y<br>D I F E R I A S E A S R L A H<br>D I F E R I A S E A S R L A<br>D I F E R I A S E A S R L                                    | 8340<br>8340<br>8340<br>8340<br>8340<br>8340<br>8340                 | 26       | 2/125                     |
| APOB               | S A S Y K A D T V A K V Q G                                                                                                                                                                                                                                                      |                                                                      |          |                           |

| Gene symbol              | Peptide sequence                                | Entrez gene ID | Score | Rank     |
|--------------------------|-------------------------------------------------|----------------|-------|----------|
|                          | - - - 1 2 3 4 5 6 7 8 9 + + +<br>3 2 1 1 2 3    |                |       |          |
| APOB                     | S A S Y K A D T V A K V Q G T                   |                |       |          |
|                          | S A S Y K A D T V A K V Q G T E                 |                |       |          |
| SCAMP2                   | S S R T F H R A A S S A A Q G A F               | 10066          | 28    | 1/329    |
|                          | S S R T F H R A A S S A A Q G A                 | 10066          |       |          |
|                          | S R T F H R A A S S A A Q G A                   | 10066          |       |          |
|                          | R T F H R A A S S A A Q G A F                   | 10066          |       |          |
| SCAMP3                   | Y G S Y S T Q A S A A A A T                     | 10067          | 22    | 13/347   |
|                          | Y G S Y S T Q A S A A A A T A                   | 10067          |       |          |
|                          | Y G S Y S T Q A S A A A A T A E                 | 10067          |       |          |
| DPP7                     | L P F G A Q S T Q R G H T E                     | 29952          | 20    | 23/492   |
| IFITM1                   | D R K M V G D V T G A Q A Y A                   | 8519           | 26    | 2/125    |
|                          | D R K M V G D V T G A Q A Y                     | 8519           |       |          |
|                          | L G F I A F A Y S V K S R D                     | 8519           | 26    | 2/125    |
|                          | V P D H V V W S L F N T L                       | 8519           | 18    | 25/125   |
| SORL1                    | K P G I Y R S N M D G S A A Y                   | 6653           | 18    | 231/2214 |
|                          | R H P I N E Y Y I A D A S E D Q V F             | 6653           | 28    | 1/2214   |
| UBE2L3                   | N P P Y D K G A F R I E I N F P A E Y P F K P P | 7332           |       |          |
|                          | P P Y D K G A F R I E I N F P A E Y P F K P P   | 7332           |       |          |
| Unnamed protein<br>DNPEP | G P P I G S F T L I D S E V S Q L               |                | 20    | 37/626   |
|                          | F E L F P S L S H N L L V D                     | 23549          | 22    | 12/475   |
| PON2                     | S P D D K Y I Y V A D I L A H E I H             | 5445           | 22    | 8/354    |
| GDI2                     | E P I E Q K F V S I S D L L V P K               | 2665           | 22    | 14/445   |
| SLC1A5                   | V A A V F I A Q L S Q Q S L D F V K             | 6510           | 26    | 4/541    |
| D4ST1                    | L P K Y I L D F S L                             | 113189         | 14    | 73/376   |
|                          | D V L P K Y I L D F S L                         | 113189         |       |          |
| SIAT1                    | G I L I V W D P S V Y H S D I P                 | 6480           | 20    | 18/406   |
| ABCC4                    | A P V L F F D R N P I G R I L                   | 10257          | 26    | 19/1325  |
| MMS19L                   | L V A F R I V H D L I S R D Y S                 | 64210          | 22    | 38/1030  |
| LARGE                    | N P L H F H L I A D S I A E Q I L               | 9215           | 22    | 18/756   |
| PPFIBP1                  | M E L P D Y V L L T A T                         | 8496           | 14    | 193/1005 |
| RNASSET2                 | S L E L Y R E L D L N S V L L                   | 8635           | 22    | 3/256    |
| ITGA4                    | I D I S F L L D V S S L S R A E                 | 3676           | 28    | 1/1038   |
|                          | I D I S F L L D V S S L S R A E E               | 3676           |       |          |
| GNA13                    | L N I F E T I V N N R V F S                     | 10672          | 28    | 1/377    |
| TIP120A                  | L E A L D I M A D M L S R Q G G                 | 55832          | 20    | 65/1230  |
|                          | o<br>x<br>L E A L D I M A D M L S R Q G         | 55832          |       |          |
| ITGB7                    | L F F F L V E D D A R G T V                     | 3695           | 26    | 10/798   |
| PGK1                     | R V V M R V D F N V P M K N                     | 5230           | 26    | 4/417    |
|                          | G P V G V F E W E A F A R G T                   | 5230           | 16    | 63/417   |
| ATIC                     | L V E F A R N L T A L G L N L V                 | 471            | 26    | 6/592    |
| RPS13                    | L P P N W K Y E S S T A S A                     | 6207           | 28    | 1/150    |
| RPS10                    | D R D T Y R R S A V P P G A D                   | 6204           | 12    | 31/165   |
|                          | A D R D T Y R R S A V P P G A D                 | 6204           |       |          |
|                          | R D T Y R R S A V P P G A D                     | 6204           |       |          |
| CTSD                     | L S R D P D A Q P G G E                         | 1509           | 14    | 88/412   |
|                          | I F S F Y L S R D P D A Q P G                   | 1509           | 16    | 75/412   |
| NAPB                     | D Y Y K G E E S N S S A N K                     | 63908          | 28    | 1/298    |
| CCT2                     | S L M V T N D G A T I L K N                     | 10576          | 20    | 24/535   |
| CPD                      | V P G T Y K I T A S A R G Y N                   | 1362           | 20    | 72/1380  |
|                          | V P G T Y K I T A S A R G Y N P V               | 1362           |       |          |
| SLAMF6                   | D T G S Y R A Q I S T K T S A K                 | 114836         | 22    | 6/331    |
| KIAA1691                 | G S S Y G S E T S I P A A A H                   | 80727          | 28    | 1/558    |
| CPNE3                    | V A R F A A A A T Q Q Q T A                     | 8895           | 28    | 1/537    |
| LY6E                     | K P T I C S D Q D N Y C V T                     | 4061           | 14    | 25/131   |

| Gene symbol | Peptide sequence                              | Entrez gene ID | Score | Rank    |
|-------------|-----------------------------------------------|----------------|-------|---------|
|             |                                               |                |       |         |
| LY6E        | L K P T I C S D Q D N Y C V T                 | 4061           |       |         |
| PSAP        | G P S Y W C Q N T E T A A Q                   | 5660           | 22    | 8/524   |
| C19orf10    | T E E F E V T K T A V A H R P G               | 56005          | 22    | 5/173   |
| NEDD4L      | D G R T F Y I D H N S K I T Q                 | 23327          | 28    | 1/854   |
| UBQLN1      | N P D T L S A M S N P R A M Q                 | 29979          | 20    | 16/589  |
| ALDOA       | A P G K G I L A A D E S T G S I A             | 226            | 26    | 2/363   |
| TNFAIP3     | E I I H K A L I D R N I Q                     | 7128           | 20    | 38/790  |
| IMPA1       | Y P S H S F I G E E S V A A G E K             | 3612           | 28    | 1/227   |
| VDAC2       | A A K Y Q L D P T A S I S A                   | 7417           | 28    | 1/347   |
| PPGB        | L P G L A K Q P S F R Q Y S G                 | 5476           | 20    | 30/480  |
| COCH        | R R F N L Q K N F V G K V A                   | 1690           | 16    | 84/550  |
|             | G Q R R F N L Q K N F V G K V A               | 1690           |       |         |
|             | I G Q R R F N L Q K N F V G K V A L           | 1690           |       |         |
| TAX1BP1     | H K G E I R G A S T P F Q F R                 | 8887           | 26    | 2/789   |
| SEMA7A      | I S I Y S S E R S V L Q                       | 8482           | 28    | 1/666   |
| STX6        | N P R K F N L D A T E L S I R                 | 10228          | 28    | 1/255   |
|             | N P R K F N L D A T E L S I R K               | 10228          |       |         |
|             | N P R K F N L D A T E L S I R K A             | 10228          |       |         |
| PTPRC       | S P G E P Q I I F C R S E A A H Q G           | 5788           | 20    | 65/1304 |
|             | S P G E P Q I I F C R S E A A H Q G V I       | 5788           |       |         |
| IGLC1       | K S Y S C Q V T H E G S T                     | 3537           | 18    | 9/105   |
|             | K S Y S C Q V T H E G S T V                   | 3537           |       |         |
|             | S H K S Y S C Q V T H E G S T                 | 3537           |       |         |
|             | S H K S Y S C Q V T H E G S T V               | 3537           |       |         |
|             | S H K S Y S C Q V T H E G S T V E K T         | 3537           |       |         |
|             | K S Y S C Q V T H E G S T V E K               | 3537           |       |         |
|             | K S Y S C Q V T H E G S T V E                 | 3537           |       |         |
|             | H K S Y S C Q V T H E G S T V                 | 3537           |       |         |
|             | H K S Y S C Q V T H E G S T V E               | 3537           |       |         |
|             | S H K S Y S C Q V T H E G S T V E             | 3537           |       |         |
|             | K S H K S Y S C Q V T H E G S T V E           | 3537           |       |         |
|             | T P E Q W K S H K S Y S C Q V T H E G S T V E | 3537           |       |         |
| IGHM        | G P T T Y K V T S T L T I K                   | 3507           | 18    | 44/454  |
|             | G P T T Y K V T S T L T I K E                 | 3507           | 18    | 44/454  |
|             | S G P T T Y K V T S T L T I K                 | 3507           |       |         |
|             | S G P T T Y K V T S T L T I K E S D W L       | 3507           |       |         |
|             | E S G P T T Y K V T S T L T I K E S D W L     | 3507           |       |         |
| IGH@        | Y L Q M N S L K T E D T                       | 3492           | 26    | 1/33    |
|             | T L Y L Q M N S L K T E D                     | 3492           |       |         |
|             | T L Y L Q M N S L K T E D T                   | 3492           |       |         |
|             | T L Y L Q M N S L K T E D T A                 | 3492           |       |         |
|             | N T L Y L Q M N S L K T E D T                 | 3492           |       |         |
|             | N T L Y L Q M N S L K T E D T A               | 3492           |       |         |
|             | K N T L Y L Q M N S L K T E D T A             | 3492           |       |         |
| UBA52       | S D Y N I Q K E S T L H L V                   | 7311           | 26    | 1/76    |
|             | D Y N I Q K E S T L H L V L R                 | 7311           |       |         |
| ACLY        | Y P E E A Y I A D L D A K S G A S             | 47             | 22    | 24/1001 |
| HTGN29      | R G Y M E I E Q S V K S F K                   | 56951          | 28    | 1/265   |
| WDR1        | A P S G F Y I A S G D V S G K L R             | 9948           | 22    | 12/606  |
|             | A P S G F Y I A S G D V S G K L               | 9948           |       |         |
| ATP1A1      | I V V Y T G D R T V M G R I A T               | 476            | 22    | 31/1023 |
|             | I V V Y T G D R T V M G R I A                 | 476            |       |         |
| CTSS        | G K E Y W L V K N S W G H N                   | 1520           | 22    | 6/331   |
|             | T T A F Q Y I I D N K G I D                   | 1520           | 18    | 40/331  |
|             | T T A F Q Y I I D N K G I D S D               | 1520           |       |         |

| Gene symbol | Peptide sequence                              | Entrez gene ID | Score | Rank    |
|-------------|-----------------------------------------------|----------------|-------|---------|
| CTSS        | K N L K F V M L H N L E H S M                 | 1520           | 22    | 6/331   |
| CLTCL1      | L E K I V L D N S V F S E H R N               | 8218           | 26    | 17/1640 |
| RNF13       | I P S V F I G E S S A N S L K D               | 11342          | 28    | 1/381   |
| MTP18       | I P I I I H P I D R S V D                     | 51537          | 20    | 9/206   |
| LAPTMS      | L P S Y E E A L S L P S K T P                 | 7805           | 28    | 1/262   |
|             | L P S Y E E A L S L P S K T P E               | 7805           |       |         |
|             | L P S Y E E A L S L P S K T P E G             | 7805           |       |         |
|             | G Y L R I A D L I S S F                       | 7805           | 22    | 12/262  |
|             | V V L P S Y E E A L S L P S K T P E           | 7805           | 28    | 1/262   |
| TPI1        | L K P E F V D I I N A K Q                     | 7167           | 20    | 10/248  |
| YWHAE       | R A S W R I I S S I E Q K E E                 | 7531           | 28    | 1/255   |
| GLG1        | K V N L L K I K T E L C K K E V               | 2734           | 20    | 36/1179 |
|             | V N L L K I K T E L C K K E V                 | 2734           |       |         |
|             | D P E L D Y T L M R V C K Q M I K             | 2734           | 20    | 36/1179 |
|             | L G K W C S E K T E T G Q E                   | 2734           | 22    | 20/1179 |
| PPIA        | V S F E L F A D K V P K T A E N               | 5478           | 20    | 6/164   |
| CCR7        | I A Y D V T Y S L A C V R                     | 1236           | 26    | 6/378   |
|             | N I A Y D V T Y S L A C V R                   | 1236           |       |         |
| PTGFRN      | V P G F A D D P T E L A C R V                 | 5738           | 28    | 1/879   |
| SLC3A2      | T G A L Y R I G D L Q A F Q G H G             | 6520           | 20    | 26/529  |
| ALB         | S P D L P K L K P D P N T L C D E F           | 280717         | 20    | 30/607  |
| RAB4A       | G A L L V Y D I T S R E T Y N                 | 5867           | 20    | 19/213  |
| CCT7        | A T Q Y F A D R D M F C A G R V P             | 10574          | 16    | 106/543 |
|             | V A T Q Y F A D R D M F C A G R V P           | 10574          |       |         |
| GPC4        | V T R A F V A A R T F A Q G L                 | 2239           | 28    | 1/556   |
| MAP1LC3B    | T P I S E V Y E S E K D E D G F L             | 81631          | 20    | 11/124  |
|             | T P I S E V Y E S E K D E D G F L Y           | 81631          |       |         |
| TNFSF9      | G P L S W Y S D P G L A G V S                 | 8744           | 16    | 84/254  |
| VCP         | Q L I Y I P L P D E K S R V A                 | 7415           | 26    | 5/806   |
| MAN2B1      | V D Y F L N V A T A Q G R Y Y                 | 4125           | 26    | 7/1010  |
|             | H P P E L L F S A S L P A L G                 | 4125           | 20    | 68/1010 |
|             | H P P E L L F S A S L P A L G F S             | 4125           |       |         |
|             | H P P E L L F S A S L P A L G F S T           | 4125           |       |         |
| CLSTN3      | N P P L F A L D K D A P L R Y                 | 9746           | 22    | 21/956  |
| Dlc2        | M E K Y N I E K D I A A Y I K                 | 140735         | 22    | 3/89    |
| LNPEP       | D V R K L Y W L M K S S L N G D N             | 4012           | 22    | 28/1025 |
| ANXA2       | V P K W I S I M T E R S V P H                 | 302            |       | 28/338  |
|             | D V P K W I S I M T E R S V P H L             | 302            |       |         |
|             | D V P K W I S I M T E R S V P H L Q           | 302            |       |         |
| C10orf128   | T G K T P G A E I D F K Y A L I G T A V G V A | 170371         | 22    | 3/155   |
| C6orf211    | I P W F V S D T T I H D F N                   | 79624          | 26    | 4/441   |
| IL6ST       | I E V W V E A E N A L G K V T                 | 3572           | 22    | 24/918  |
| CD74        | M H H W L L F E M S R H S L E                 | 972            | 26    | 2/296   |
|             | A T P L L M Q A L P M G A L P Q G P           | 972            | 20    | 14/296  |
| DDX1        | G Y L P N Q L F R T F                         | 1653           |       |         |
| CREG        | W G A L A T I S T L E A V R                   | 8804           | 28    | 1/220   |
| VPS35       | D P D P E D F A D E Q S L V G R F I           | 55737          | 22    | 31/796  |
| HPCL2       | A I P F V I E K A V R S S I Y                 | 26061          | 26    | 2/578   |
|             | A I P F V I E K A V R S S I Y G               |                |       |         |
| ACAA1       | L K P A F K K D G S T T A G N                 | 30             | 28    | 1/424   |
| KIAA0494    | F S Q F L G D P V E K A A Q                   | 9813           | 22    | 13/495  |
| APOD        | Q E L R A D G T V N Q I E G                   |                |       |         |
| CD38        | R D M F T L E D T L L G Y L A D               | 952            | 22    | 7/300   |
|             | R D M F T L E D T L L G                       | 952            |       |         |
|             | R D M F T L E D T L                           | 952            |       |         |
|             | V Q R D M F T L E D T L                       | 952            |       |         |

| Gene symbol | Peptide sequence                                           | Entrez gene ID | Score | Rank    |
|-------------|------------------------------------------------------------|----------------|-------|---------|
|             | - - - <b>1</b> 2 3 4 5 6 7 8 <b>9</b> + + +<br>3 2 1 1 2 3 |                |       |         |
| ACTG1       | W I S K <b>Q</b> E Y <b>D</b> E S G P S I V H R K C F      | 71             | 18    | 40/375  |
|             | T D Y L M K I L T E R <b>G</b> Y S                         | 71             | 20    | 20/375  |
|             | T D Y L M K I L T E R <b>G</b> Y S F                       | 71             |       |         |
|             | T D Y L M K I L T E R <b>G</b> Y S F T                     | 71             |       |         |
|             | R D L T D Y L M K I L T E R <b>G</b> Y S                   | 71             |       |         |
|             | G R D L T D Y L M K I L T E R <b>G</b> Y S                 | 71             |       |         |
| RAB8        | A <b>F</b> F T L A R D I <b>K</b> A K M D                  | 4218           | 28    | 1/207   |
|             | N A <b>F</b> F T L A R D I <b>K</b> A K M D                | 4218           |       |         |
| AGRN        | G R S F L A <b>F</b> P T L R A Y H T                       | 375790         | 28    | 1/2026  |
|             | G R S F L A <b>F</b> P T L R A Y H T L                     | 375790         |       |         |
|             | E G R S F L A <b>F</b> P T L R A Y H T L                   | 375790         |       |         |
|             | P V P A F E G R S F L A <b>F</b> P T L R A Y H T L         | 375790         |       |         |
|             | A P V P A F E G R S F L A <b>F</b> P T L R A Y H T L       | 375790         |       |         |
| IGF2R       | L I T <b>F</b> L C <b>D</b> R <b>D</b> A G V G F P E       | 3482           | 22    | 43/2491 |
|             | L I T <b>F</b> L C <b>D</b> R <b>D</b> A G V G F P         | 3482           |       |         |
| UBE2L3      | K G A <b>F</b> R I E I N F P A E Y P F K P P               | 7332           | 28    | 1/154   |
|             | D K G A <b>F</b> R I E I N F P A E Y P F K P P             | 7332           |       |         |

Peptides are arranged according to their HLA-DR4 binding motive ([www.syfpeithi.de](http://www.syfpeithi.de)), indicated by score and rank. Anchor amino acids are printed bold.
