# Supplementary material
Source: PubMed Central journal article supplement (PMC1142372)
Supplement: pnas_0501190102_3.pdf [file pnas_0501190102_3.pdf]

**Table 4. Sequences of posttranslationally modified peptides eluted from HLA-DR**

| Gene symbol | Peptide sequence |    |          |          |          |          |          |           |          |          |   |          |          |    |    |     |   | Entrez gene ID | Score | Rank   |      |
|-------------|------------------|----|----------|----------|----------|----------|----------|-----------|----------|----------|---|----------|----------|----|----|-----|---|----------------|-------|--------|------|
|             | -3               | -2 | -1       | <b>1</b> | 2        | 3        | <b>4</b> | 5         | <b>6</b> | 7        | 8 | <b>9</b> | +1       | +2 | +3 |     |   |                |       |        |      |
| HLA-A       | D                | T  | <i>E</i> | <b>F</b> | V        | R        | <b>F</b> | D         | <b>S</b> | D        | A | <b>A</b> | S        | Q  | R  | M   | E | 3105           | 28    | 1/256  |      |
|             | D                |    | <i>E</i> | <b>F</b> | V        | R        | <b>F</b> | D         | <b>S</b> | D        | A | <b>A</b> | S        | Q  | R  | M   | E | P              |       |        | 3105 |
|             | D                | T  | <i>E</i> | <b>F</b> | V        | R        | <b>F</b> | D         | <b>S</b> | D        | A | <b>A</b> | S        | Q  | R  | Mox | E | P              |       |        | 3105 |
| LY6E        | L                | K  | P        | T        | <b>I</b> | <i>C</i> | S        | <b>D</b>  | Q        | <b>D</b> | N | Y        | <b>C</b> | V  | T  |     |   | 4061           | 14    | 25/131 |      |
| CD53 (1)    | I                | H  | R        | <b>Y</b> | H        | S        | <b>D</b> | <i>N</i>  | <b>S</b> | T        | K | <b>A</b> | A        | W  | D  |     |   | 28             | 1     |        |      |
|             |                  |    |          |          |          |          |          | <i>Gl</i> |          |          |   |          |          |    |    |     |   |                |       |        |      |
|             | S                | I  | H        | R        | <b>Y</b> | H        | S        | <b>D</b>  | <i>N</i> | <b>S</b> | T | K        | <b>A</b> | A  | W  | D   |   |                |       |        |      |
|             |                  |    |          |          |          |          |          | <i>Gl</i> |          |          |   |          |          |    |    |     |   |                |       |        |      |

Peptides are arranged according to their HLA-DR4 binding motive ([www.syfpeithi.de](http://www.syfpeithi.de)), indicated by score and rank. Anchor amino acids are printed in bold. Modifications are printed in italics: *E*, deamidation; *C*, cysteinylolation; *Gl*, glycosylation.

1. Dengjel, J., Rammensee, H. G. & Stevanovic, S. (2005) *J. Mass Spectrom.* **40**, 100-104.
