# Supplementary material
Source: PubMed Central journal article supplement (PMC1142372)
Supplement: pnas_0501190102_4.pdf [file pnas_0501190102_4.pdf]

**Table 5. Gene ontology (GO) categories significantly up-regulated under starvation**

| Gene category<br>(GO ID, GO system)                                  | Entrez<br>gene ID | Gene symbol                                             | Gene title                                                                                 | x-fold over-<br>expression |      |
|----------------------------------------------------------------------|-------------------|---------------------------------------------------------|--------------------------------------------------------------------------------------------|----------------------------|------|
|                                                                      |                   |                                                         |                                                                                            | 6 h                        | 24 h |
| <b>Vesicular transport and membrane trafficking</b>                  |                   |                                                         |                                                                                            |                            |      |
| <i>ARF guanyl-nucleotide ex-change factor activity</i><br>(5086, MF) | 26269             | FBXO8                                                   | F-box only protein 8                                                                       | 2.1                        | 4.0  |
|                                                                      | 9267              | PSCD1                                                   | Pleckstrin homology, Sec7 and coiled-coil domains 1                                        | 2.1                        | 2.5  |
|                                                                      | 9265              | PSCD3                                                   | Pleckstrin homology, Sec7 and coiled-coil domains 3                                        | 2.6                        | 2.6  |
| <i>Small GTPase mediated signal transduction</i><br>(7264, BP)       | 399               | ARHH                                                    | Ras homolog gene family, member H                                                          | 1.4                        | 2.1  |
|                                                                      | 23433             | ARHQ                                                    | Ras homolog gene family, member Q                                                          | 2.6                        | 3.7  |
|                                                                      | 221079            | ARL8                                                    | ADP-ribosylation factor-like 8                                                             | 2.5                        | 4.3  |
|                                                                      | 55207             | FLJ10702                                                | Hypothetical protein FLJ10702                                                              | 2.1                        | 3.0  |
|                                                                      | 2669              | GEM                                                     | GTP binding protein overexpressed in skeletal muscle                                       | 3.5                        | 8.0  |
|                                                                      | 2889              | GRF2                                                    | Guanine nucleotide-releasing factor 2                                                      | 1.6                        | 1.4  |
|                                                                      | 3845              | KRAS2                                                   | v-Ki-ras2 Kirsten rat sarcoma 2 viral oncogene homolog                                     | 1.5                        | 2.6  |
|                                                                      | 51762             | LOC51762                                                | RAB-8b protein                                                                             | 1.7                        | 2.0  |
|                                                                      | 51735             | PDZGEF2                                                 | PDZ domain containing guanine nucleotide exchange factor (GEF) 2                           | 4.0                        | 4.0  |
|                                                                      | 5862              | RAB2                                                    | RAB2, member RAS oncogene family                                                           | 1.6                        | 2.5  |
|                                                                      | 84932             | RAB2B                                                   | RAB2B, member RAS oncogene family                                                          | 1.4                        | 2.1  |
|                                                                      | 5868              | RAB5A                                                   | RAB5A, member RAS oncogene family                                                          | 1.5                        | 2.0  |
|                                                                      | 9367              | RAB9A                                                   | RAB9A, member RAS oncogene family                                                          | 2.3                        | 2.3  |
|                                                                      | 10890             | RAB10                                                   | RAB10, member RAS oncogene family                                                          | 1.4                        | 2.3  |
|                                                                      | 51552             | RAB14                                                   | RAB14, member RAS oncogene family                                                          | 1.4                        | 1.7  |
|                                                                      | 23011             | RAB21                                                   | RAB21, member RAS oncogene family                                                          | 1.4                        | 2.5  |
|                                                                      | 57403             | RAB22A                                                  | RAB22A, member RAS oncogene family                                                         | 1.6                        | 2.1  |
|                                                                      | 5898              | RALA                                                    | v-Ral simian leukemia viral oncogene homolog A                                             | 1.4                        | 2.3  |
|                                                                      | 57826             | RAP2C                                                   | RAP2C, member of RAS oncogene family                                                       | 1.6                        | 2.1  |
|                                                                      | 6009              | RHEB                                                    | Ras homolog enriched in brain                                                              | 1.6                        | 1.5  |
|                                                                      | 121268            | RHEBL1                                                  | Ras homolog enriched in brain like 1                                                       | 5.3                        | 3.0  |
|                                                                      | 6016              | RIT1                                                    | Ras-like without CAAX 1                                                                    | 1.5                        | 2.3  |
|                                                                      | 64121             | RRAGC                                                   | Ras-related GTP binding C                                                                  | 2.6                        | 2.8  |
| 22800                                                                | RRAS2             | Related RAS viral (r-ras) oncogene homolog 2            | 1.5                                                                                        | 1.9                        |      |
| 8036                                                                 | SHOC2             | Soc-2 suppressor of clear homolog ( <i>C. elegans</i> ) | 1.7                                                                                        | 2.1                        |      |
| 6478                                                                 | SIAH2             | Seven in absentia homolog 2 ( <i>Drosophila</i> )       | 2.1                                                                                        | 3.0                        |      |
| 7248                                                                 | TSC1              | Tuberous sclerosis 1                                    | 1.9                                                                                        | 2.1                        |      |
| <b>Amino acid transport and metabolism</b>                           |                   |                                                         |                                                                                            |                            |      |
| <i>Amino acid transport</i><br>(6865, BP)                            | 6558              | SLC12A2                                                 | Solute carrier family 12 (sodium/potassium/chloride transporters), member 2                | 1.4                        | 3.0  |
|                                                                      | 6509              | SLC1A4                                                  | Solute carrier family 1 (glutamate/neutral amino acid transporter), member 4               | 2.1                        | 4.0  |
| <i>Neutral amino acid transporter activity</i><br>(15175, MF)        | 6510              | SLC1A5                                                  | Solute carrier family 1 (neutral amino acid transporter), member 5                         | 1.4                        | 3.0  |
| <i>Amino acid permease activity</i><br>(15359, MF)                   | 81539             | SLC38A1                                                 | Solute carrier family 38, member 1                                                         | 2.0                        | 3.7  |
|                                                                      | 54407             | SLC38A2                                                 | Solute carrier family 38, member 2                                                         | 4.3                        | 4.9  |
|                                                                      | 6520              | SLC3A2                                                  | Solute carrier family 3 (activators of dibasic and neutral amino acid transport), member 2 | 2.6                        | 4.6  |
|                                                                      | 6541              | SLC7A1                                                  | Solute carrier family 7 (cationic amino acid transporter, y+ system), member 1             | 2.8                        | 3.7  |
|                                                                      | 23657             | SLC7A11                                                 | Solute carrier family 7, (cationic amino acid transporter, y+ system) member 11            | 3.2                        | 4.6  |
|                                                                      | 8140              | SLC7A5                                                  | Solute carrier family 7 (cationic amino acid transporter, y+ system), member 5             | 3.0                        | 4.9  |
|                                                                      | 1491              | CTH                                                     | Cystathionase (cystathionine $\gamma$ -lyase)                                              | 5.7                        | 18.4 |
| <i>Serine family amino acid biosynthesis</i><br>(9070, BP)           | 26227             | PHGDH                                                   | Phosphoglycerate dehydrogenase                                                             | 2.6                        | 6.1  |
|                                                                      | 29968             | PSAT1                                                   | Phosphoserine aminotransferase 1                                                           | 3.7                        | 9.8  |
|                                                                      | 5723              | PSPH                                                    | Phosphoserine phosphatase                                                                  | 2.3                        | 6.1  |
| <b>Effects on cell cycle</b>                                         |                   |                                                         |                                                                                            |                            |      |
| <i>Cell cycle arrest</i><br>(7050, BP)                               | 1026              | CDKN1A                                                  | Cyclin-dependent kinase inhibitor 1A (p21, Cip1)                                           | 1.9                        | 2.6  |
|                                                                      | 1027              | CDKN1B                                                  | Cyclin-dependent kinase inhibitor 1B (p27, Kip1)                                           | 1.5                        | 3.2  |
|                                                                      | 1647              | GADD45A                                                 | Growth arrest and DNA-damage-inducible, alpha                                              | 2.8                        | 3.5  |
|                                                                      | 8522              | GAS7                                                    | Growth arrest-specific 7                                                                   | 1.6                        | 3.0  |
|                                                                      | 283431            | LOC283431                                               | Hypothetical protein LOC283431                                                             | 1.6                        | 4.3  |
|                                                                      | 5325              | PLAGL1                                                  | Pleiomorphic adenoma gene-like 1                                                           | 1.4                        | 2.0  |
|                                                                      | 23645             | PPP1R15A                                                | Protein phosphatase 1, regulatory (inhibitor) subunit 15A                                  | 8.0                        | 5.7  |
|                                                                      | 83667             | SESN2                                                   | Sestrin 2                                                                                  | 4.3                        | 12.1 |
| <i>Protein phosphatase type 2C activity</i><br>(15071, MF)           | 5494              | PPM1A                                                   | Protein phosphatase 1A (formerly 2C), magnesium-dependent, $\alpha$ isoform                | 2.3                        | 2.6  |
|                                                                      | 8493              | PPM1D                                                   | Protein phosphatase 1D magnesium-dependent, $\delta$ isoform                               | 2.1                        | 4.6  |

| Gene category<br>(GO ID, GO system)        | Entrez<br>gene ID                   | Gene symbol                                       | Gene title                                                                                | x-fold over-<br>expression                                                     |                                                  |     |     |
|--------------------------------------------|-------------------------------------|---------------------------------------------------|-------------------------------------------------------------------------------------------|--------------------------------------------------------------------------------|--------------------------------------------------|-----|-----|
|                                            |                                     |                                                   |                                                                                           | 6 h                                                                            | 24 h                                             |     |     |
| <b>Apoptosis</b>                           |                                     |                                                   |                                                                                           |                                                                                |                                                  |     |     |
| <i>Apoptosis</i><br>(6915, BP)             | 64651                               | AXUD1                                             | AXIN1 up-regulated 1                                                                      | 2.6                                                                            | 4.6                                              |     |     |
|                                            | 596                                 | BCL2                                              | B-cell CLL/lymphoma 2                                                                     | 1.6                                                                            | 4.9                                              |     |     |
|                                            | 597                                 | BCL2A1                                            | BCL2-related protein A1                                                                   | 1.9                                                                            | 1.9                                              |     |     |
|                                            | 598                                 | BCL2L1                                            | BCL2-like 1                                                                               | 1.4                                                                            | 1.9                                              |     |     |
|                                            | 329                                 | BIRC2                                             | Baculoviral IAP repeat-containing 2                                                       | 1.6                                                                            | 2.8                                              |     |     |
|                                            | 331                                 | BIRC4                                             | Baculoviral IAP repeat-containing 4                                                       | 1.5                                                                            | 1.5                                              |     |     |
|                                            | 664                                 | BNIP3                                             | BCL2/adenovirus E1B 19kDa interacting protein 3                                           | 1.4                                                                            | 1.7                                              |     |     |
|                                            | 665                                 | BNIP3L                                            | BCL2/adenovirus E1B 19kDa interacting protein 3-like                                      | 2.1                                                                            | 2.6                                              |     |     |
|                                            | 8837                                | CFLAR                                             | CASP8 and FADD-like apoptosis regulator                                                   | 1.7                                                                            | 1.5                                              |     |     |
|                                            | 8087                                | FXR1                                              | Fragile X mental retardation, autosomal homolog 1                                         | 1.5                                                                            | 1.6                                              |     |     |
|                                            | 1647                                | GADD45A                                           | Growth arrest and DNA-damage-inducible, $\alpha$                                          | 2.8                                                                            | 3.5                                              |     |     |
|                                            | 4616                                | GADD45B                                           | Growth arrest and DNA-damage-inducible, $\beta$                                           | 2.6                                                                            | 4.6                                              |     |     |
|                                            | 8870                                | IER3                                              | Immediate early response 3                                                                | 1.4                                                                            | 1.5                                              |     |     |
|                                            | 51747                               | LUC7A                                             | Cisplatin resistance-associated overexpressed protein                                     | 1.4                                                                            | 2.1                                              |     |     |
|                                            | 4170                                | MCL1                                              | Myeloid cell leukemia sequence 1 (BCL2-related)                                           | 2.1                                                                            | 1.7                                              |     |     |
|                                            | 4790                                | NFKB1                                             | Nuclear factor of $\kappa$ light polypeptide gene enhancer in B-cells 1 (p105)            | 1.6                                                                            | 2.1                                              |     |     |
|                                            | 7262                                | PHLDA2                                            | Pleckstrin homology-like domain, family A, member 2                                       | 3.0                                                                            | 2.6                                              |     |     |
|                                            | 23645                               | PPP1R15A                                          | Protein phosphatase 1, regulatory (inhibitor) subunit 15A                                 | 8.0                                                                            | 5.7                                              |     |     |
|                                            | 5885                                | RAD21                                             | RAD21 homolog ( <i>S. pombe</i> )                                                         | 1.5                                                                            | 2.5                                              |     |     |
|                                            | 8767                                | RIPK2                                             | Receptor-interacting serine-threonine kinase 2                                            | 1.7                                                                            | 3.0                                              |     |     |
|                                            | 64121                               | RRAGC                                             | Ras-related GTP binding C                                                                 | 2.6                                                                            | 2.8                                              |     |     |
|                                            | 6446                                | SGK                                               | Serum/glucocorticoid regulated kinase                                                     | 9.2                                                                            | 1.7                                              |     |     |
|                                            | 23411                               | SIRT1                                             | Sirtuin 1 ( <i>S. cerevisiae</i> )                                                        | 3.2                                                                            | 4.3                                              |     |     |
|                                            | 9263                                | STK17A                                            | Serine/threonine kinase 17a (apoptosis-inducing)                                          | 1.9                                                                            | 2.5                                              |     |     |
|                                            | 9262                                | STK17B                                            | Serine/threonine kinase 17b (apoptosis-inducing)                                          | 1.6                                                                            | 1.9                                              |     |     |
|                                            | 7009                                | TEGT                                              | Testis enhanced gene transcript (BAX inhibitor 1)                                         | 1.5                                                                            | 2.5                                              |     |     |
|                                            | 7124                                | TNF                                               | Tumor necrosis factor (TNF superfamily, member 2)                                         | 2.0                                                                            | 1.4                                              |     |     |
|                                            | 7128                                | TNFAIP3                                           | Tumor necrosis factor, $\alpha$ -induced protein 3                                        | 2.1                                                                            | 2.6                                              |     |     |
|                                            | 8795                                | TNFRSF10B                                         | Tumor necrosis factor receptor superfamily, member 10b                                    | 2.5                                                                            | 3.0                                              |     |     |
|                                            | 8793                                | TNFRSF10D                                         | Tumor necrosis factor receptor superfamily, member 10d, decoy with truncated death domain | 9.2                                                                            | 13.9                                             |     |     |
|                                            | 958                                 | TNFRSF5                                           | Tumor necrosis factor receptor superfamily, member 5                                      | 1.9                                                                            | 1.4                                              |     |     |
|                                            | 355                                 | TNFRSF6                                           | Tumor necrosis factor receptor superfamily, member 6                                      | 1.9                                                                            | 2.1                                              |     |     |
|                                            | 3604                                | TNFRSF9                                           | Tumor necrosis factor receptor superfamily, member 9                                      | 2.1                                                                            | 2.1                                              |     |     |
|                                            | 970                                 | TNFSF7                                            | Tumor necrosis factor (ligand) superfamily, member 7                                      | 1.6                                                                            | 2.0                                              |     |     |
|                                            | 8626                                | TP73L                                             | Tumor protein p73-like                                                                    | 1.4                                                                            | 2.5                                              |     |     |
|                                            | 7187                                | TRAF3                                             | TNF receptor-associated factor 3                                                          | 1.6                                                                            | 1.6                                              |     |     |
|                                            | 8565                                | YARS                                              | Tyrosyl-tRNA synthetase                                                                   | 2.1                                                                            | 1.7                                              |     |     |
|                                            | <i>Anti-apoptosis</i><br>(6916, BP) | 596                                               | BCL2                                                                                      | B-cell CLL/lymphoma 2                                                          | 1.6                                              | 4.9 |     |
|                                            |                                     | 597                                               | BCL2A1                                                                                    | BCL2-related protein A1                                                        | 1.9                                              | 1.9 |     |
|                                            |                                     | <i>Apoptosis inhibitor activity</i><br>(8189, MF) | 598                                                                                       | BCL2L1                                                                         | BCL2-like 1                                      | 1.4 | 1.9 |
|                                            |                                     |                                                   | 329                                                                                       | BIRC2                                                                          | Baculoviral IAP repeat-containing 2              | 1.6 | 2.8 |
|                                            |                                     |                                                   | 331                                                                                       | BIRC4                                                                          | Baculoviral IAP repeat-containing 4              | 1.5 | 1.5 |
|                                            |                                     |                                                   | 664                                                                                       | BNIP3                                                                          | BCL2/adenovirus E1B 19-kDa interacting protein 3 | 1.4 | 1.7 |
|                                            |                                     |                                                   | 673                                                                                       | BRAF                                                                           | v-Raf murine sarcoma viral oncogene homolog B1   | 1.4 | 3.7 |
|                                            |                                     |                                                   | 8837                                                                                      | CFLAR                                                                          | CASP8 and FADD-like apoptosis regulator          | 1.7 | 1.5 |
|                                            |                                     |                                                   | 25816                                                                                     | GG2-1                                                                          | TNF-induced protein                              | 1.9 | 2.6 |
|                                            |                                     |                                                   | 8870                                                                                      | IER3                                                                           | Immediate early response 3                       | 1.4 | 1.5 |
| 4790                                       |                                     |                                                   | NFKB1                                                                                     | Nuclear factor of $\kappa$ light polypeptide gene enhancer in B-cells 1 (p105) | 1.6                                              | 2.1 |     |
| 5663                                       |                                     |                                                   | PSEN1                                                                                     | Presenilin 1 (Alzheimer disease 3)                                             | 1.7                                              | 2.8 |     |
| 5055                                       |                                     | SERPINB2                                          | Serine (or cysteine) proteinase inhibitor, clade B, member 2                              | 1.9                                                                            | 3.7                                              |     |     |
| 8887                                       |                                     | TAX1BP1                                           | Tax1 binding protein 1                                                                    | 1.4                                                                            | 2.0                                              |     |     |
| 7124                                       |                                     | TNF                                               | Tumor necrosis factor (TNF superfamily, member 2)                                         | 2.0                                                                            | 1.4                                              |     |     |
| 7128                                       |                                     | TNFAIP3                                           | Tumor necrosis factor, $\alpha$ -induced protein 3                                        | 2.1                                                                            | 2.6                                              |     |     |
| 355                                        |                                     | TNFRSF6                                           | Tumor necrosis factor receptor superfamily, member 6                                      | 1.9                                                                            | 2.1                                              |     |     |
| <b>Sphingoid and ceramide metabolism</b>   |                                     |                                                   |                                                                                           |                                                                                |                                                  |     |     |
| <i>Sphingoid metabolism</i><br>(46519, BP) |                                     | 427                                               | ASAH1                                                                                     | N-acylsphingosine amidohydrolase (acid ceramidase) 1                           | 1.4                                              | 2.6 |     |
|                                            |                                     | 8439                                              | NSMAF                                                                                     | Neutral sphingomyelinase (N-SMase) activation associated factor                | 2.5                                              | 1.7 |     |
| <i>Ceramide metabolism</i><br>(6672, BP)   | 5515                                | PPP2CA                                            | Protein phosphatase 2 (formerly 2A), catalytic subunit, alpha isoform                     | 1.4                                                                            | 1.5                                              |     |     |
|                                            | 7357                                | UGCG                                              | UDP-glucose ceramide glucosyltransferase                                                  | 3.2                                                                            | 3.2                                              |     |     |

| <i>Gene category</i><br>(GO ID, GO system)              | Entrez<br>gene ID | Gene symbol | Gene title                                            | x-fold over-<br>expression |      |
|---------------------------------------------------------|-------------------|-------------|-------------------------------------------------------|----------------------------|------|
|                                                         |                   |             |                                                       | 6 h                        | 24 h |
| <b>Regulation of transcription</b>                      |                   |             |                                                       |                            |      |
| <i>Transcription corepressor activity</i><br>(3714, MF) | 467               | ATF3        | Activating transcription factor 3                     | 6.5                        | 8.0  |
|                                                         | 22809             | ATF5        | Activating transcription factor 5                     | 1.4                        | 1.5  |
|                                                         | 1810              | DR1         | Down-regulator of transcription 1, TBP-binding        | 1.4                        | 2.3  |
|                                                         | 3726              | JUNB        | Jun B proto-oncogene                                  | 1.7                        | 2.0  |
|                                                         | 11278             | KLF12       | Kruppel-like factor 12                                | 1.9                        | 2.5  |
|                                                         | 4601              | MXI1        | MAX interacting protein 1                             | 1.9                        | 2.5  |
|                                                         | 23522             | MYST4       | MYST histone acetyltransferase (monocytic leukemia) 4 | 1.9                        | 1.7  |
|                                                         | 8554              | PIAS1       | Protein inhibitor of activated STAT, 1                | 1.7                        | 1.4  |
|                                                         | 5971              | RELB        | v-Rel reticuloendotheliosis viral oncogene homolog B  | 1.5                        | 1.4  |
|                                                         | 6478              | SIAH2       | Seven in absentia homolog 2 ( <i>Drosophila</i> )     | 2.1                        | 3.0  |
|                                                         | 22797             | TFEC        | Transcription factor EC                               | 1.4                        | 5.3  |
|                                                         | 7528              | YY1         | YY1 transcription factor                              | 2.0                        | 2.5  |
| <i>Histone acetyltransferase activity</i><br>(4402, MF) | 1387              | CREBBP      | CREB binding protein (Rubinstein-Taybi syndrome)      | 1.6                        | 1.9  |
|                                                         | 2033              | EP300       | E1A binding protein p300                              | 1.6                        | 2.0  |
|                                                         | 23522             | MYST4       | MYST histone acetyltransferase (monocytic leukemia) 4 | 1.9                        | 1.7  |
|                                                         | 8202              | NCOA3       | Nuclear receptor coactivator 3                        | 1.7                        | 2.0  |
| <b>Nuclear membrane</b>                                 |                   |             |                                                       |                            |      |
| <i>Nuclear inner membrane</i><br>(5637, CC)             | 4000              | LMNA        | Lamin A/C                                             | 3.5                        | 2.3  |
|                                                         | 23592             | MAN1        | Integral inner nuclear membrane protein               | 1.6                        | 2.1  |
|                                                         | 5663              | PSEN1       | Presenilin 1 (Alzheimer disease 3)                    | 1.7                        | 2.8  |

Genes fulfilling the up-regulation requirements are shown (2 means 200% of mRNA was detected in starved compared with control cells). The first column indicates the GO category together with the GO ID and the GO system (BP, biological process; CC, cellular component; MF, molecular function).
