# Supplementary material
Source: PubMed Central journal article supplement (PMC1142372)
Supplement: pnas_0501190102_5.pdf [file pnas_0501190102_5.pdf]

**Table 6. Gene ontology (GO) categories significantly down-regulated under starvation**

| Gene category<br>(GO ID, GO system)                    | Entrez<br>gene ID | Gene<br>symbol                                          | Gene title                                                                                          | x-fold over-<br>expression |       |
|--------------------------------------------------------|-------------------|---------------------------------------------------------|-----------------------------------------------------------------------------------------------------|----------------------------|-------|
|                                                        |                   |                                                         |                                                                                                     | 6 h                        | 24 h  |
| <b>Vesicular transport</b>                             |                   |                                                         |                                                                                                     |                            |       |
| <i>Golgi stack</i><br>(5795, CC)                       | 23062             | GGA2                                                    | Golgi associated, $\gamma$ adaptin ear containing, ARF binding protein 2                            | -1.5                       | -1.7  |
|                                                        | 23163             | GGA3                                                    | Golgi associated, $\gamma$ adaptin ear containing, ARF binding protein 3                            | -1.6                       | -3.2  |
|                                                        | 2778              | GNAS                                                    | GNAS complex locus                                                                                  | -1.5                       | -1.9  |
|                                                        | 4952              | OCRL                                                    | Oculocerebrorenal syndrome of Lowe                                                                  | -1.5                       | -2.3  |
|                                                        | 10040             | TOM1L1                                                  | Target of myb1-like 1 (chicken)                                                                     | -1.9                       | -1.6  |
| <b>DNA replication and repair</b>                      |                   |                                                         |                                                                                                     |                            |       |
| <i>DNA replication origin binding</i><br>(3688, MF)    | 4999              | ORC2L                                                   | Origin recognition complex, subunit 2-like (yeast)                                                  | -1.6                       | -1.6  |
|                                                        | 23595             | ORC3L                                                   | Origin recognition complex, subunit 3-like (yeast)                                                  | -1.6                       | -1.5  |
|                                                        | 5001              | ORC5L                                                   | Origin recognition complex, subunit 5-like (yeast)                                                  | -1.5                       | -2.0  |
| <i>Damaged DNA binding</i><br>(3684, MF)               | 672               | BRCA1                                                   | Breast cancer 1, early onset                                                                        | -1.5                       | -2.3  |
|                                                        | 2237              | FEN1                                                    | Flap structure-specific endonuclease 1                                                              | -1.6                       | -2.6  |
|                                                        | 2967              | GTF2H3                                                  | General transcription factor IIH, polypeptide 3, 34kDa                                              | -1.4                       | -1.6  |
|                                                        | 7965              | JTV1                                                    | JTV1 gene                                                                                           | -1.5                       | -4.0  |
|                                                        | 5383              | PMS2L5                                                  | Postmeiotic segregation increased 2-like 5                                                          | -1.7                       | -4.3  |
|                                                        | 5889              | RAD51C                                                  | RAD51 homolog C ( <i>S. cerevisiae</i> )                                                            | -1.7                       | -1.5  |
|                                                        | 5892              | RAD51L3                                                 | RAD51-like 3 ( <i>S. cerevisiae</i> )                                                               | -1.6                       | -1.7  |
|                                                        | 7508              | XPC                                                     | Xeroderma pigmentosum, complementation group C                                                      | -1.4                       | -1.4  |
|                                                        | 7517              | XRCC3                                                   | X-ray repair complementing defective repair in Chinese hamster cells 3                              | -1.4                       | -1.6  |
| <b>Ribosome formation</b>                              |                   |                                                         |                                                                                                     |                            |       |
| <i>Ribosome biogenesis and assembly</i><br>(42254, BP) | 10969             | EBNA1BP2                                                | EBNA1 binding protein 2                                                                             | -1.6                       | -2.5  |
|                                                        | 23212             | RRS1                                                    | Ribosome biogenesis regulator homolog ( <i>S. cerevisiae</i> )                                      | -2.5                       | -3.0  |
| <i>Nucleolus</i><br>(5730, CC)                         | 1663              | DDX11                                                   | DEAD/H (Asp-Glu-Ala-Asp/His) box polypeptide 11 (CHL1-like helicase homolog, <i>S. cerevisiae</i> ) | -1.6                       | -2.6  |
|                                                        | 54606             | DDX56                                                   | DEAD (Asp-Glu-Ala-Asp) box polypeptide 56                                                           | -1.4                       | -4.0  |
|                                                        | 50628             | GEMIN4                                                  | Gem (nuclear organelle) associated protein 4                                                        | -3.2                       | -10.6 |
|                                                        | 23567             | JAZ                                                     | Double-stranded RNA-binding zinc finger protein JAZ                                                 | -1.4                       | -1.9  |
|                                                        | 84365             | MKI67IP                                                 | MKI67 (FHA domain) interacting nucleolar phosphoprotein                                             | -1.7                       | -1.9  |
|                                                        | 10514             | MYBBP1A                                                 | MYB binding protein (P160) 1a                                                                       | -1.9                       | -3.5  |
|                                                        | 4809              | NHP2L1                                                  | NHP2 non-histone chromosome protein 2-like 1 ( <i>S. cerevisiae</i> )                               | -1.4                       | -1.6  |
|                                                        | 10528             | NOL5A                                                   | Nucleolar protein 5A (56kDa with KKE/D repeat)                                                      | -1.4                       | -1.7  |
|                                                        | 9221              | NOLC1                                                   | Nucleolar and coiled-body phosphoprotein 1                                                          | -1.4                       | -1.4  |
|                                                        | 54512             | RRP41                                                   | Exosome complex exonuclease RRP41                                                                   | -2.5                       | -18.4 |
|                                                        | 6949              | TCOF1                                                   | Treacher Collins-Franceschetti syndrome 1                                                           | -1.6                       | -1.7  |
| 7343                                                   | UBTF              | Upstream binding transcription factor, RNA polymerase I | -2.5                                                                                                | -4.3                       |       |
| <b>RNA synthesis and processing</b>                    |                   |                                                         |                                                                                                     |                            |       |
| <i>RNA cap binding</i><br>(339, MF)                    | 1973              | EIF4A1                                                  | Eukaryotic translation initiation factor 4A, isoform 1                                              | -1.7                       | -1.7  |
|                                                        | 9470              | EIF4EL3                                                 | Eukaryotic translation initiation factor 4E-like 3                                                  | -4.3                       | -5.7  |
|                                                        | 4686              | NCBP1                                                   | Nuclear cap binding protein subunit 1, 80 kDa                                                       | -1.5                       | -1.7  |
|                                                        | 22916             | NCBP2                                                   | Nuclear cap binding protein subunit 2, 20 kDa                                                       | -1.4                       | -1.7  |
|                                                        | 10073             | RNUT1                                                   | RNA, U transporter 1                                                                                | -1.4                       | -2.3  |
| <i>RNA elongation</i><br>(6354, BP)                    | 5438              | POLR2I                                                  | Polymerase (RNA) II (DNA directed) polypeptide I                                                    | -1.5                       | -2.8  |
|                                                        | 51728             | POLR3K                                                  | Polymerase (RNA) III (DNA directed) polypeptide K                                                   | -1.6                       | -2.5  |
|                                                        | 30834             | ZNRD1                                                   | Zinc ribbon domain containing, 1                                                                    | -1.6                       | -2.1  |

| Gene category<br>(GO ID, GO system)                  | Entrez<br>gene ID                     | Gene<br>symbol | Gene title                                                                | x-fold over-<br>expression                       |       |
|------------------------------------------------------|---------------------------------------|----------------|---------------------------------------------------------------------------|--------------------------------------------------|-------|
|                                                      |                                       |                |                                                                           | 6 h                                              | 24 h  |
| Pre-mRNA splicing factor activity<br>(8284, MF)      | 9416                                  | DDX23          | DEAD (Asp-Glu-Ala-Asp) box polypeptide 23                                 | -1.9                                             | -1.6  |
|                                                      | 25929                                 | GEMIN5         | Gem (nuclear organelle) associated protein 5                              | -2.1                                             | -6.1  |
|                                                      | 79833                                 | GEMIN6         | Gem (nuclear organelle) associated protein 6                              | -3.0                                             | -4.6  |
|                                                      | 84967                                 | LSM10          | U7 snRNP-specific Sm-like protein LSM10                                   | -1.5                                             | -2.5  |
|                                                      | 57819                                 | LSM2           | LSM2 homolog, U6 small nuclear RNA associated ( <i>S. cerevisiae</i> )    | -1.5                                             | -3.2  |
|                                                      | 23658                                 | LSM5           | LSM5 homolog, U6 small nuclear RNA associated ( <i>S. cerevisiae</i> )    | -1.4                                             | -2.0  |
|                                                      | 51691                                 | LSM8           | LSM8 homolog, U6 small nuclear RNA associated ( <i>S. cerevisiae</i> )    | -1.7                                             | -1.9  |
|                                                      | 8559                                  | PRPF18         | PRP18 pre-mRNA processing factor 18 homolog (yeast)                       | -3.2                                             | -4.3  |
|                                                      | 9128                                  | PRPF4          | PRP4 pre-mRNA processing factor 4 homolog (yeast)                         | -2.0                                             | -5.3  |
|                                                      | 6426                                  | SFRS1          | Splicing factor, arginine/serine-rich 1 (splicing factor 2)               | -1.6                                             | -3.2  |
|                                                      | 9169                                  | SFRS2IP        | Splicing factor, arginine/serine-rich 2, interacting protein              | -1.5                                             | -2.1  |
|                                                      | 6432                                  | SFRS7          | Splicing factor, arginine/serine-rich 7, 35 kDa                           | -1.4                                             | -3.7  |
|                                                      | 8487                                  | SIP1           | Survival of motor neuron protein interacting protein 1                    | -2.0                                             | -4.3  |
|                                                      | RNA polymerase complex<br>(30880, CC) | 5433           | POLR2D                                                                    | Polymerase (RNA) II (DNA directed) polypeptide D | -2.1  |
| 5438                                                 |                                       | POLR2I         | Polymerase (RNA) II (DNA directed) polypeptide I                          | -1.5                                             | -2.8  |
| 51728                                                |                                       | POLR3K         | Polymerase (RNA) III (DNA directed) polypeptide K                         | -1.6                                             | -2.5  |
| 10622                                                |                                       | RPC32          | Polymerase (RNA) III (DNA directed) (32 kDa)                              | -1.5                                             | -2.6  |
| 171568                                               |                                       | RPC8           | RNA polymerase III subunit RPC8                                           | -1.9                                             | -3.5  |
| 9169                                                 |                                       | SFRS2IP        | Splicing factor, arginine/serine-rich 2, interacting protein              | -1.5                                             | -2.1  |
| 23528                                                |                                       | ZNF281         | Zinc finger protein 281                                                   | -1.5                                             | -2.0  |
| rRNA transcription<br>(9303, BP)                     | 2971                                  | GTF3A          | General transcription factor IIIA                                         | -1.7                                             | -2.1  |
|                                                      | 84365                                 | MKI67IP        | MKI67 (FHA domain) interacting nucleolar phosphoprotein                   | -1.7                                             | -1.9  |
| rRNA processing<br>(6364, BP)                        | 10436                                 | C2F            | C2f protein                                                               | -1.5                                             | -3.7  |
|                                                      | 54606                                 | DDX56          | DEAD (Asp-Glu-Ala-Asp) box polypeptide 56                                 | -1.4                                             | -4.0  |
|                                                      | 29960                                 | FTSJ2          | FtsJ homolog 2 ( <i>E. coli</i> )                                         | -1.7                                             | -2.3  |
|                                                      | 50628                                 | GEMIN4         | Gem (nuclear organelle) associated protein 4                              | -3.2                                             | -10.6 |
|                                                      | 10528                                 | NOL5A          | Nucleolar protein 5A (56kDa with KKE/D repeat)                            | -1.4                                             | -1.7  |
|                                                      | 9221                                  | NOLC1          | Nucleolar and coiled-body phosphoprotein 1                                | -1.4                                             | -1.4  |
|                                                      | 22984                                 | PDCD11         | Programmed cell death 11                                                  | -1.5                                             | -2.6  |
|                                                      | 23404                                 | RRP4           | Homolog of Yeast RRP4 (ribosomal RNA processing 4), 3'-5'-exoribonuclease | -1.9                                             | -3.7  |
|                                                      | 51010                                 | RRP40          | Exosome component Rrp40                                                   | -2.1                                             | -1.9  |
|                                                      | 54512                                 | RRP41          | Exosome complex exonuclease RRP41                                         | -2.5                                             | -18.4 |
| Transcription from Pol III<br>promoter<br>(6383, BP) | 672                                   | BRCA1          | Breast cancer 1, early onset                                              | -1.5                                             | -2.3  |
|                                                      | 2971                                  | GTF3A          | General transcription factor IIIA                                         | -1.7                                             | -2.1  |
|                                                      | 10625                                 | IVNS1ABP       | Influenza virus NS1A binding protein                                      | -1.7                                             | -5.7  |
|                                                      | 51728                                 | POLR3K         | Polymerase (RNA) III (DNA directed) polypeptide K                         | -1.6                                             | -2.5  |
|                                                      | 10622                                 | RPC32          | Polymerase (RNA) III (DNA directed) (32 kDa)                              | -1.5                                             | -2.6  |
|                                                      | 171568                                | RPC8           | RNA polymerase III subunit RPC8                                           | -1.9                                             | -3.5  |
|                                                      | 6619                                  | SNAPC3         | Small nuclear RNA activating complex, polypeptide 3                       | -1.4                                             | -2.0  |
|                                                      | 10302                                 | SNAPC5         | Small nuclear RNA activating complex, polypeptide 5                       | -1.6                                             | -1.7  |
| tRNA processing<br>(8033, BP)                        | 81627                                 | C1orf25        | Chromosome 1 open reading frame 25                                        | -2.1                                             | -3.2  |
|                                                      | 83480                                 | FKSG32         | Hypothetical protein FKSG32                                               | -1.4                                             | -2.1  |
|                                                      | 79042                                 | LENG5          | Leukocyte receptor cluster (LRC) member 5                                 | -1.4                                             | -2.1  |
|                                                      | 80746                                 | MGC2776        | Hypothetical protein MGC2776                                              | -2.0                                             | -3.0  |
|                                                      | 10940                                 | POP1           | Processing of precursors 1                                                | -1.7                                             | -3.2  |
|                                                      | 80324                                 | PUS1           | Pseudouridylyl synthase 1                                                 | -1.5                                             | -2.0  |
|                                                      | 11102                                 | RPP14          | Ribonuclease P (14kD)                                                     | -1.6                                             | -1.4  |
|                                                      | 10248                                 | RPP20          | POP7 (processing of precursor, <i>S. cerevisiae</i> ) homolog             | -1.6                                             | -3.2  |
|                                                      | 10557                                 | RPP38          | Ribonuclease P (38kD)                                                     | -1.6                                             | -1.7  |
|                                                      | 51095                                 | TRNT1          | tRNA nucleotidyl transferase, CCA-adding, 1                               | -1.6                                             | -2.5  |
|                                                      | 10785                                 | WDR4           | WD repeat domain 4                                                        | -1.6                                             | -2.1  |
| tRNA-specific ribonuclease activity<br>(4549, MF)    | 79042                                 | LENG5          | Leukocyte receptor cluster (LRC) member 5                                 | -1.4                                             | -2.1  |
|                                                      | 80746                                 | MGC2776        | Hypothetical protein MGC2776                                              | -2.0                                             | -3.0  |
|                                                      | 10940                                 | POP1           | Processing of precursors 1                                                | -1.7                                             | -3.2  |
|                                                      | 11102                                 | RPP14          | Ribonuclease P (14 kDa)                                                   | -1.6                                             | -1.4  |
|                                                      | 10248                                 | RPP20          | POP7 (processing of precursor, <i>S. cerevisiae</i> ) homolog             | -1.6                                             | -3.2  |
|                                                      | 10557                                 | RPP38          | Ribonuclease P (38 kDa)                                                   | -1.6                                             | -1.7  |

| Gene category<br>(GO ID, GO system)                        | Entrez<br>gene ID | Gene<br>symbol | Gene title                                              | x-fold over-<br>expression |      |
|------------------------------------------------------------|-------------------|----------------|---------------------------------------------------------|----------------------------|------|
|                                                            |                   |                |                                                         | 6 h                        | 24 h |
| <b>Mitochondrial metabolism</b>                            |                   |                |                                                         |                            |      |
| <i>Protein-mitochondrial targeting</i><br>(6626, BP)       | 26515             | FXC1           | Fracture callus 1 homolog (rat)                         | -1.7                       | -2.6 |
|                                                            | 80273             | GRPEL1         | GrpE-like 1, mitochondrial ( <i>E. coli</i> )           | -1.4                       | -2.0 |
|                                                            | 3329              | HSPD1          | Heat shock 60-kDa protein 1 (chaperonin)                | -1.7                       | -4.0 |
|                                                            | 1678              | TIMM8A         | Translocase of inner mitochondrial membrane 8 homolog A | -2.6                       | -3.7 |
|                                                            | 26521             | TIMM8B         | Translocase of inner mitochondrial membrane 8 homolog B | -1.5                       | -2.0 |
|                                                            | 26520             | TIMM9          | Translocase of inner mitochondrial membrane 9 homolog   | -1.4                       | -1.6 |
|                                                            | 51095             | TRNT1          | tRNA nucleotidyl transferase, CCA-adding, 1             | -1.6                       | -2.5 |
| <i>Protein translocase activity</i><br>(15450, MF)         | 51300             | C3orf1         | Chromosome 3 open reading frame 1                       | -1.5                       | -2.0 |
|                                                            | 26515             | FXC1           | Fracture callus 1 homolog (rat)                         | -1.7                       | -2.6 |
|                                                            | 55176             | SEC61A2        | Sec61 $\alpha$ 2 subunit ( <i>S. cerevisiae</i> )       | -1.4                       | -1.5 |
|                                                            | 1678              | TIMM8A         | Translocase of inner mitochondrial membrane 8 homolog A | -2.6                       | -3.7 |
|                                                            | 26521             | TIMM8B         | Translocase of inner mitochondrial membrane 8 homolog B | -1.5                       | -2.0 |
|                                                            | 26520             | TIMM9          | Translocase of inner mitochondrial membrane 9 homolog   | -1.4                       | -1.6 |
| <i>Carnitine O-acyltransferase activity</i><br>(16406, MF) | 1375              | CPT1B          | Carnitine palmitoyltransferase 1B (muscle)              | -1.7                       | -1.9 |
|                                                            | 1376              | CPT2           | Carnitine palmitoyltransferase II                       | -2.0                       | -7.0 |
|                                                            | 54677             | CROT           | Carnitine O-octanoyltransferase                         | -1.7                       | -1.7 |

Genes fulfilling the down-regulation requirements are shown (-2 means 50% of mRNA was detected in starved compared with control cells). The first column indicates the GO category together with the GO ID and the GO system (BP, biological process; CC, cellular component; MF, molecular function).
